# Supplementary material for: Tailoring the photoluminescence of AIE-type gold nanoclusters via biomineralization-inspired polymorphism
Source: Royal Society of Chemistry journal article supplement (doi:10.1039/d4nr04022h), 2024-11-19
Supplement: d4nr04022h1.pdf [file d4nr04022h1.pdf]

## Supporting Information

### Tailoring the Photoluminescence of AIE-Type Gold Nanoclusters via Biomineralization-Inspired Polymorphism

Sukhendu Mahata<sup>a,b</sup>, Satya Ranjan Sahoo<sup>a,b</sup>, Arun Mukhopadhyay<sup>a,b</sup>, Komal Kumari<sup>c</sup>, Surajit Rakshit<sup>c</sup> and Nirmal Goswami<sup>a,b\*</sup>

<sup>a</sup>Materials Chemistry Department, CSIR-Institute of Minerals and Materials Technology, Bhubaneswar 751013, Odisha, India.

<sup>b</sup>Academy of Scientific and Innovative Research (AcSIR), Ghaziabad 201002, Uttar Pradesh, India.

<sup>c</sup>Department of Chemistry, Institute of Science, Banaras Hindu University, Varanasi 221005, Uttar Pradesh, India.

Corresponding Author's Email: [ngoswami@immt.res.in](mailto:ngoswami@immt.res.in)

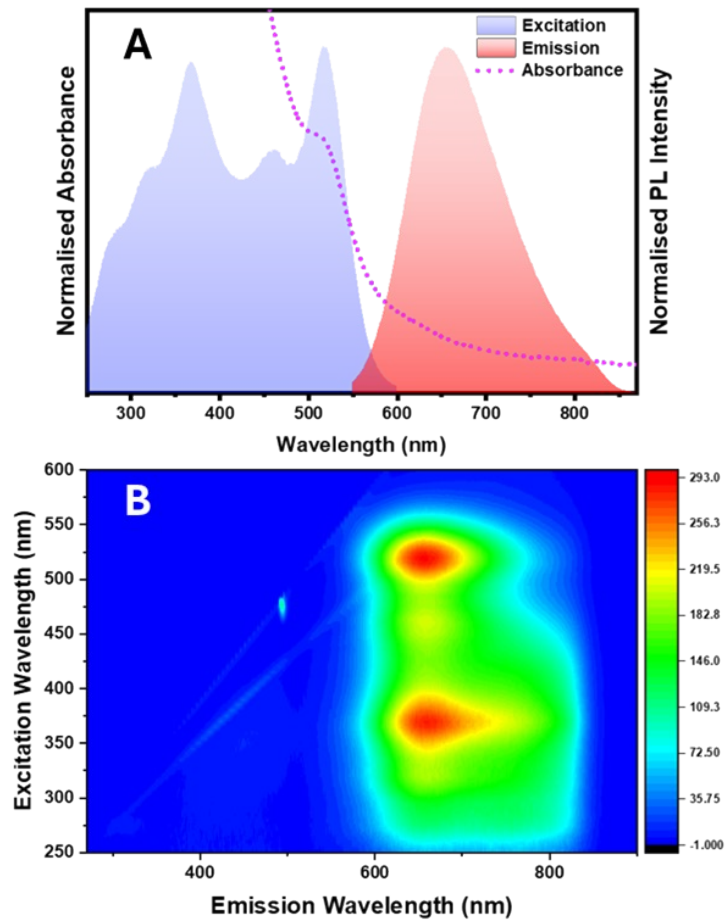

**Fig. S1.** (A) Excitation, Emission and Absorbance spectrum of  $\text{Au}_{22}\text{SG}_{18}$ . (B) 2D Excitation Emission spectra of  $\text{Au}_{22}\text{SG}_{18}$ . ( $\lambda_{\text{ex}} = 520 \text{ nm}$ )

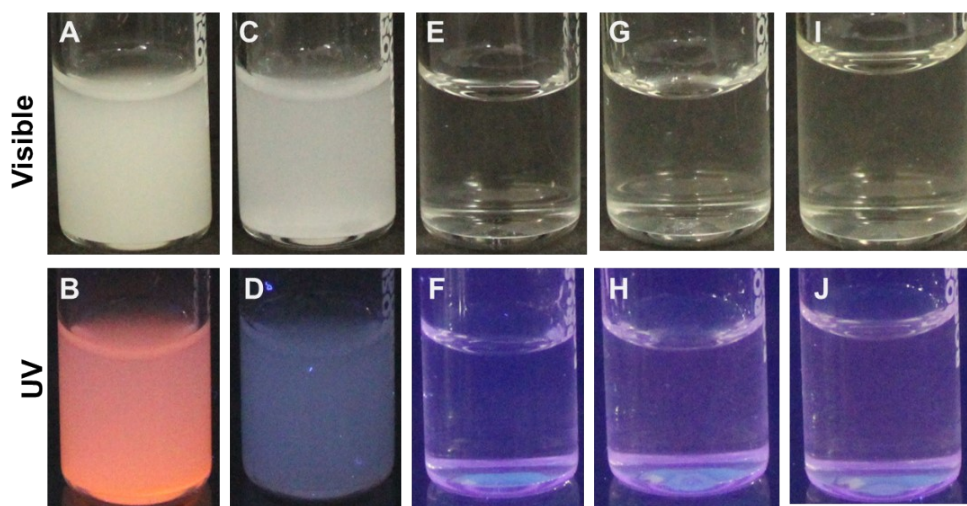

**Fig. S2.** Photographic images of  $\text{Au}_{22}\text{SG}_{18}$  @ $\text{CaCO}_3$ -Cube (A-B),  $\text{CaCO}_3$ - Cube (C-D),  $\text{CaCl}_2$  in EG/water (E-F),  $\text{Au}_{22}\text{SG}_{18}/\text{CaCl}_2$  in EG/water (G-H),  $\text{Au}_{22}\text{SG}_{18}$  in EG/water (I-J) under UV and visible light.

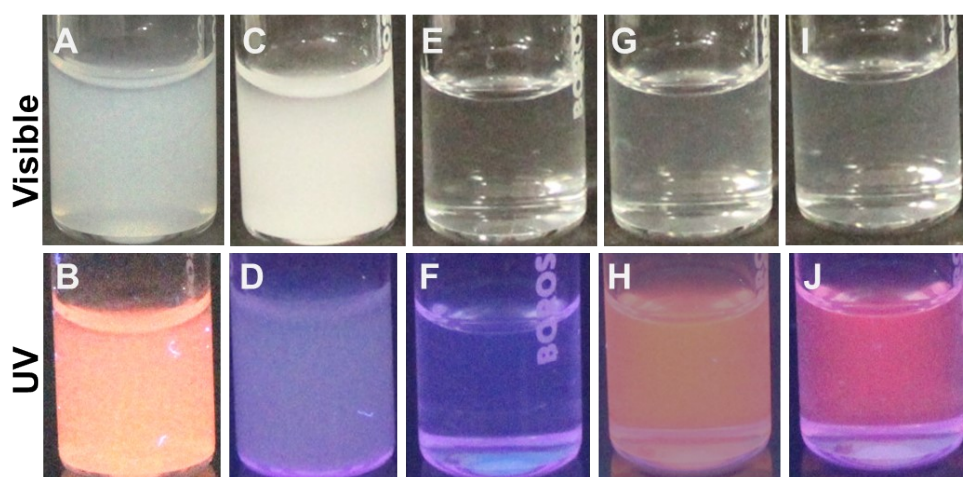

**Fig. S3.** Photographic images of Au<sub>22</sub>SG<sub>18</sub> @CaCO<sub>3</sub>-Cube/Sphere(A-B), CaCO<sub>3</sub>-Cube/Sphere(C-D), CaCl<sub>2</sub> in water-ethanol (E-F), Au<sub>22</sub>SG<sub>18</sub>/ CaCl<sub>2</sub> in water-ethanol (G-H), Au<sub>22</sub>SG<sub>18</sub> in water-ethanol(I-J)

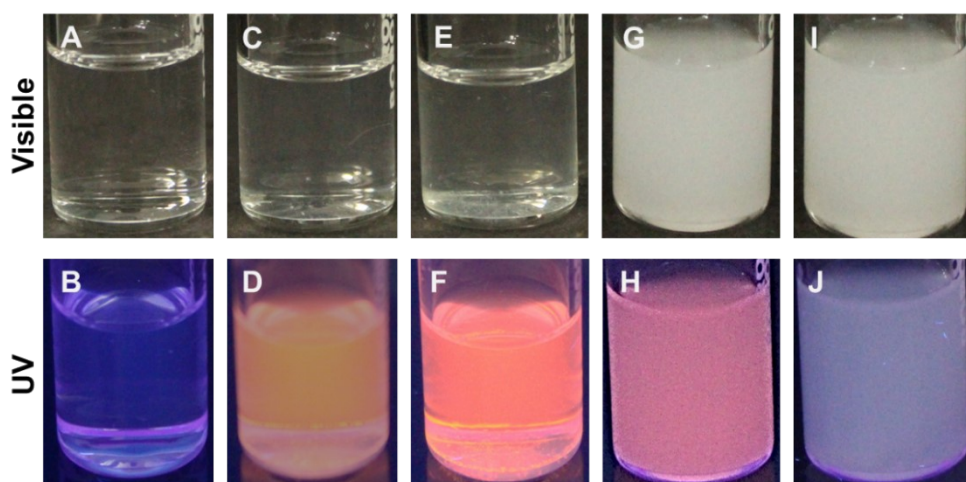

**Fig. S4.** Photographic images of CaCl<sub>2</sub> in ethanol/water (A-B), Au<sub>22</sub>SG<sub>18</sub>/CaCl<sub>2</sub> in ethanol/water(C-D), Au<sub>22</sub>SG<sub>18</sub> in ethanol/water (E-F), Au<sub>22</sub>SG<sub>18</sub> @CaCO<sub>3</sub> -sphere (G-H), CaCO<sub>3</sub> -Sphere(I-J)

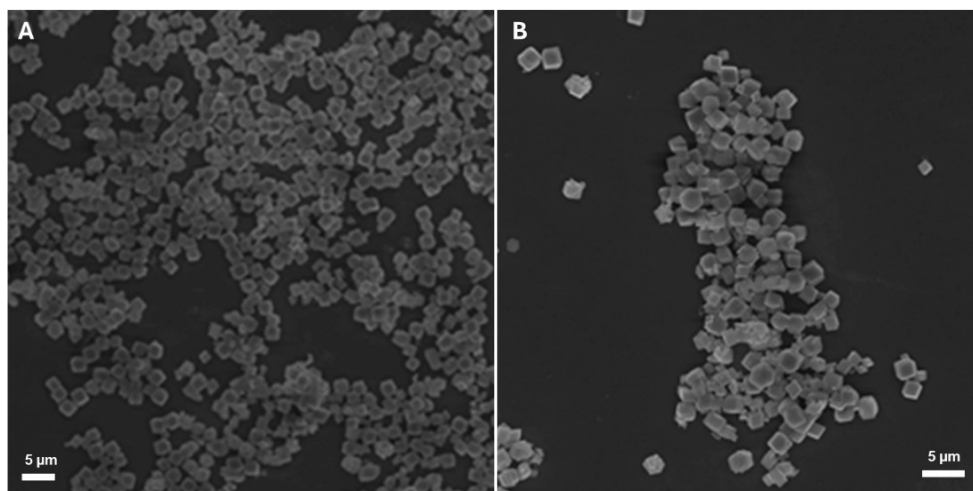

**Fig. S5.** FESEM images of CaCO<sub>3</sub>-Cube-control

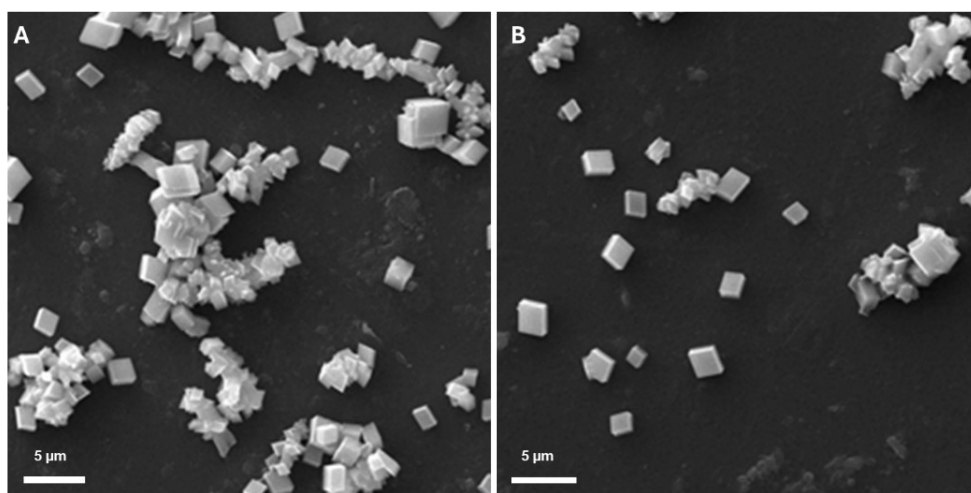

**Fig. S6.** FESEM image of CaCO<sub>3</sub>-Cube/Sphere-control

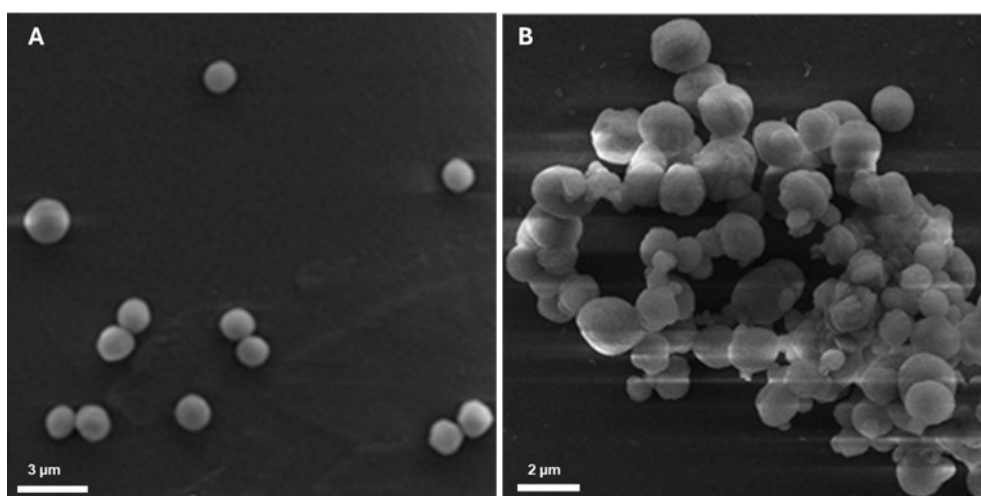

**Fig. S7.** FESEM images of CaCO<sub>3</sub>-Sphere-Control

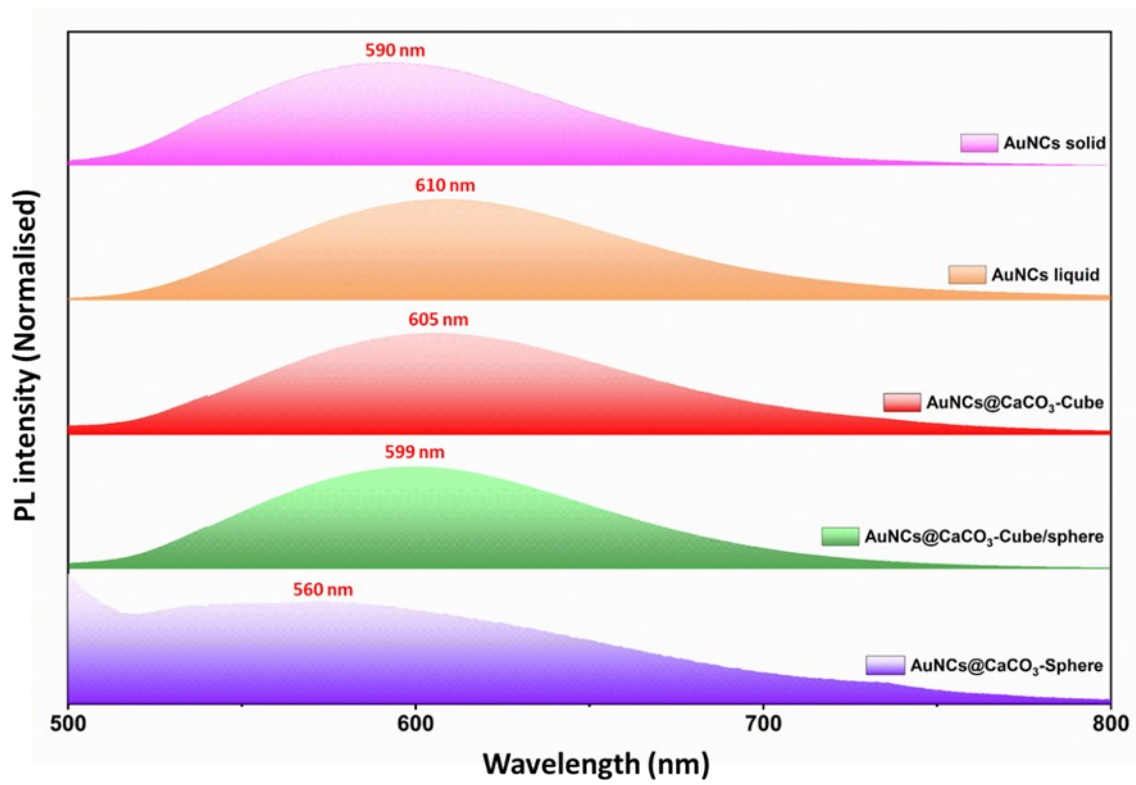

Fig. S8. PL intensity of AuNCs@CaCO<sub>3</sub>-composites (excitation wavelength = 375 nm).

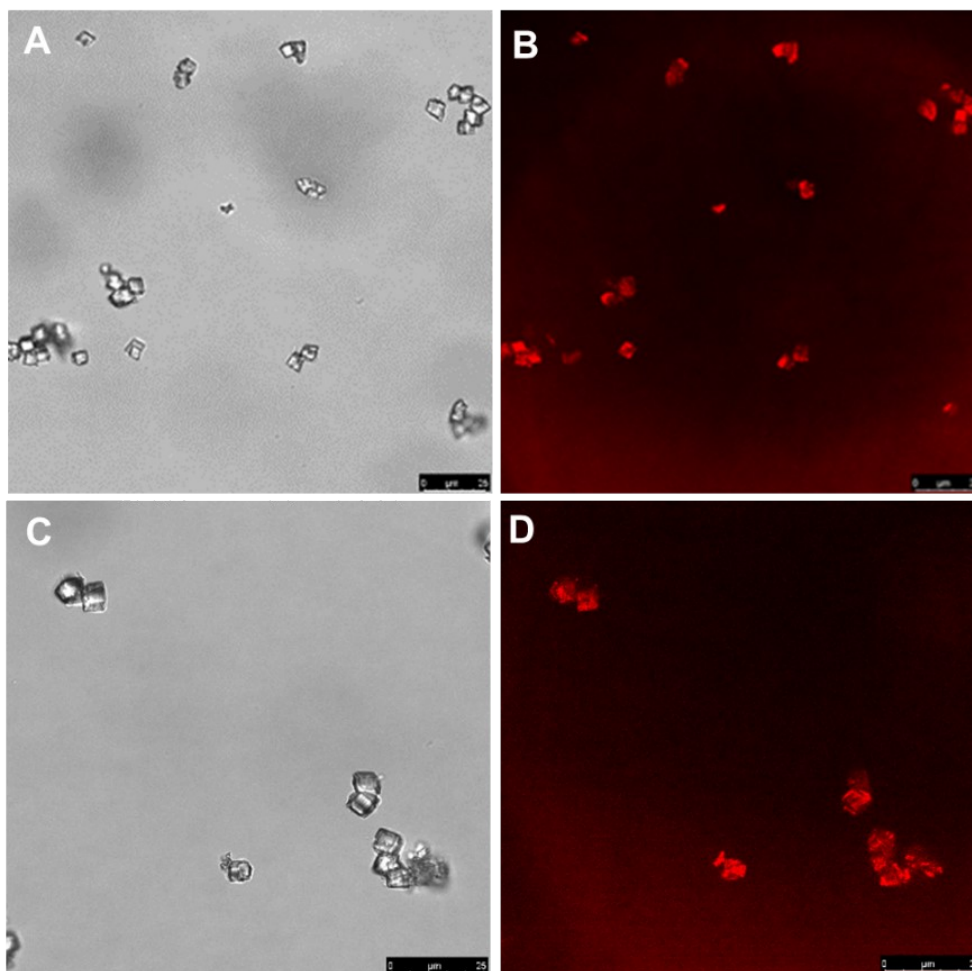

**Fig. S9.** Confocal microscopic images of  $\text{Au}_{22}\text{SG}_{18}@\text{CaCO}_3\text{-Cube}$

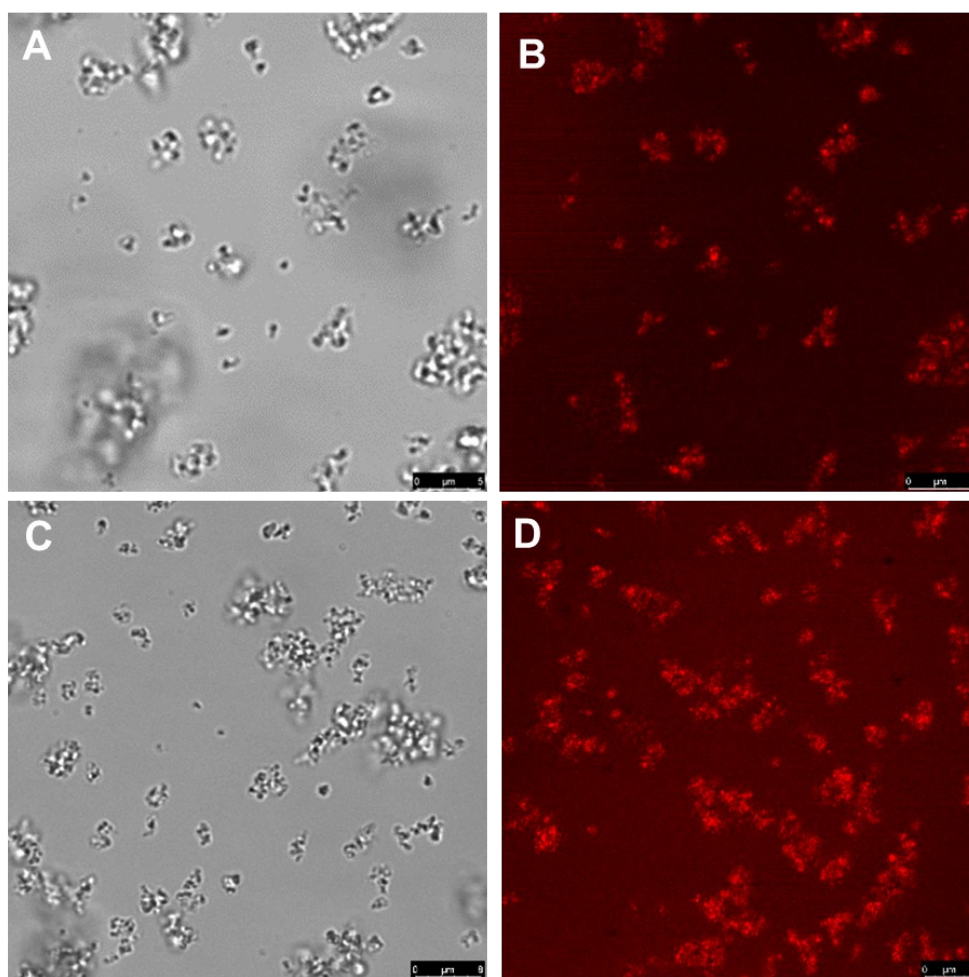

**Fig. S10.** Confocal microscopic image of  $\text{Au}_{22}\text{SG}_{18}@\text{CaCO}_3$ -Sphere

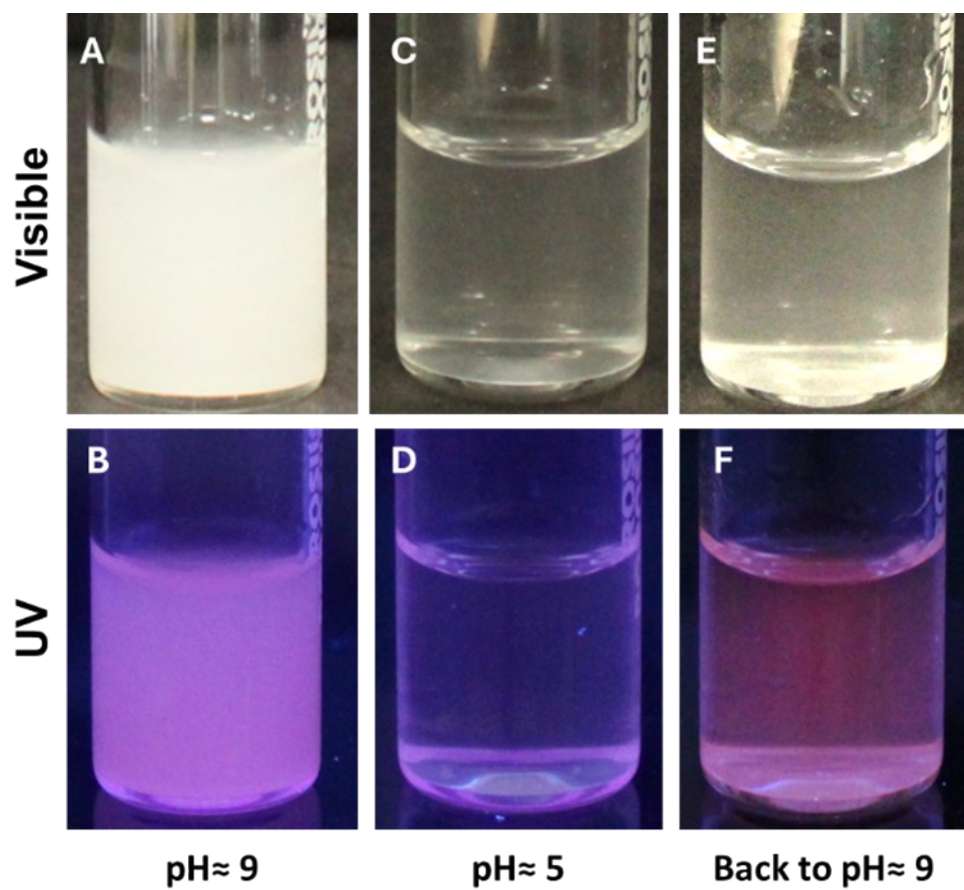

**Fig. S11.** Photographic images of  $\text{Au}_{22}\text{SG}_{18} @\text{CaCO}_3$  -Cube at different pH under visible and UV light, at pH  $\approx$  9 (A-B), pH  $\approx$  5 (E-D), back to pH  $\approx$  9 (E-F).



**Table S1.** Summary of lifetime values of as synthesized Au<sub>22</sub>SG<sub>18</sub> NCs embedded CaCO<sub>3</sub> matrices in microsecond time scale. Excitation wavelength = 375 nm; emission wavelength = 660 nm.

| Samples                                                           | A <sub>1</sub> | τ <sub>1</sub> (ns) | A <sub>2</sub> | τ <sub>2</sub> (ns) | A <sub>3</sub> | τ <sub>3</sub> (ns) | τ <sub>avg</sub> (ns) |
|-------------------------------------------------------------------|----------------|---------------------|----------------|---------------------|----------------|---------------------|-----------------------|
| Au <sub>22</sub> SG <sub>18</sub> @CaCO <sub>3</sub> -Cube        | 1049.07        | 1477.57             | 4074.15        | 8988.54             | 0              | 0                   | 7450.53               |
| Au <sub>22</sub> SG <sub>18</sub> @CaCO <sub>3</sub> -Cube/Sphere | 2976.56        | 2580.48             | 2425.08        | 10433.34            | 0              | 0                   | 6106.04               |
| Au <sub>22</sub> SG <sub>18</sub> @CaCO <sub>3</sub> -Sphere      | 3628.95        | 1963.96             | 1734.56        | 9179.09             | 0              | 0                   | 4297.33               |
| Au <sub>22</sub> SG <sub>18</sub>                                 | 2734           | 209.5               | 1980           | 1038                | 548.4          | 3426                | 856.51                |

**Table S2.** Summary of lifetime values of as synthesized Au<sub>22</sub>SG<sub>18</sub> NCs embedded CaCO<sub>3</sub> matrices in nanosecond time scale. Excitation wavelength = 375 nm; emission wavelength = 660 nm.

| Samples                                                           | A <sub>1</sub> | τ <sub>1</sub> (ns) | A <sub>2</sub> | τ <sub>2</sub> (ns) | A <sub>1</sub> +A <sub>2</sub> | A <sub>1</sub> /(A <sub>1</sub> +A <sub>2</sub> ) | A <sub>2</sub> /(A <sub>1</sub> +A <sub>2</sub> ) | τ <sub>avg</sub> (ns) |
|-------------------------------------------------------------------|----------------|---------------------|----------------|---------------------|--------------------------------|---------------------------------------------------|---------------------------------------------------|-----------------------|
| Au <sub>22</sub> SG <sub>18</sub> @CaCO <sub>3</sub> -Cube        | 0.010          | 76.714              | 0              | 0                   | 0.01                           | 1                                                 | 0                                                 | 76.714                |
| Au <sub>22</sub> SG <sub>18</sub> @CaCO <sub>3</sub> -Cube/Sphere | 0.011          | 45.746              | 0              | 0                   | 0.011                          | 1                                                 | 0                                                 | 45.746                |
| Au <sub>22</sub> SG <sub>18</sub> @CaCO <sub>3</sub> -Sphere      | 0.026          | 1.233               | 0.009          | 35.7956             | 0.035                          | 0.743                                             | 0.257                                             | 10.121                |
| Au <sub>22</sub> SG <sub>18</sub> solid                           | 0.005          | 25.387              | 0              | 0                   | 0.005                          | 1                                                 | 0                                                 | 25.387                |
| Au <sub>22</sub> SG <sub>18</sub> liquid                          | 0.035          | 1.150               | 0.016          | 38.565              | 0.051                          | 0.686                                             | 0.314                                             | 12.887                |

Table S3: The atomic concentration of gold in each composite determined by ICP-OES.

| Material                                                          | Amount of Au in 1 mg composite (mg) |
|-------------------------------------------------------------------|-------------------------------------|
| Au <sub>22</sub> SG <sub>18</sub> @CaCO <sub>3</sub> -Cube        | 1.591 × 10 <sup>-2</sup>            |
| Au <sub>22</sub> SG <sub>18</sub> @CaCO <sub>3</sub> -Cube/Sphere | 0.684 × 10 <sup>-2</sup>            |
| Au <sub>22</sub> SG <sub>18</sub> @CaCO <sub>3</sub> -Sphere      | 0.796 × 10 <sup>-2</sup>            |
